# Supplementary material for: AHR promoter variant modulates its transcription and downstream effectors by allele-specific AHR-SP1 interaction functioning as a genetic marker for vitiligo
Source: PubMed Central journal article supplement (PMC4570213; doi:10.1038/srep13542), 2015-09-15
Supplement: srep13542-s1.pdf [file srep13542-s1.pdf]

**Supplementary information**

***AHR* promoter variant modulates its transcription and downstream effectors by allele-specific *AHR*-SP1 interaction functioning as a genetic marker for vitiligo**

Xiaowen Wang<sup>1,2</sup>, Kai Li<sup>1,2</sup>, Ling Liu<sup>1,2</sup>, Qiong Shi<sup>1</sup>, Pu Song<sup>1</sup>, Zhe Jian<sup>1</sup>, Sen Guo<sup>1</sup>,  
Gang Wang<sup>1</sup>, Chunying Li<sup>1\*</sup> & Tianwen Gao<sup>1\*</sup>

<sup>1</sup>Department of Dermatology, Xijing Hospital, Fourth Military Medical University,  
Xi'an, Shaanxi, China

<sup>2</sup>Xiaowen Wang, Kai Li and Ling Liu contributed equally to this work.

**Supplementary Fig. S1** Genotypes and sequence analysis of *AHR* -129C>T variation in PIG1 and LiBr cells. (a) Genotyping the -129C>T polymorphism in normal human melanocyte cell line (PIG1) and various human melanoma cell lines (A2085, P70 1676, LiBr, A378, 67 and 140). (b) Sequencing the *AHR* polymerase chain reaction products of PIG1 and LiBr cells.

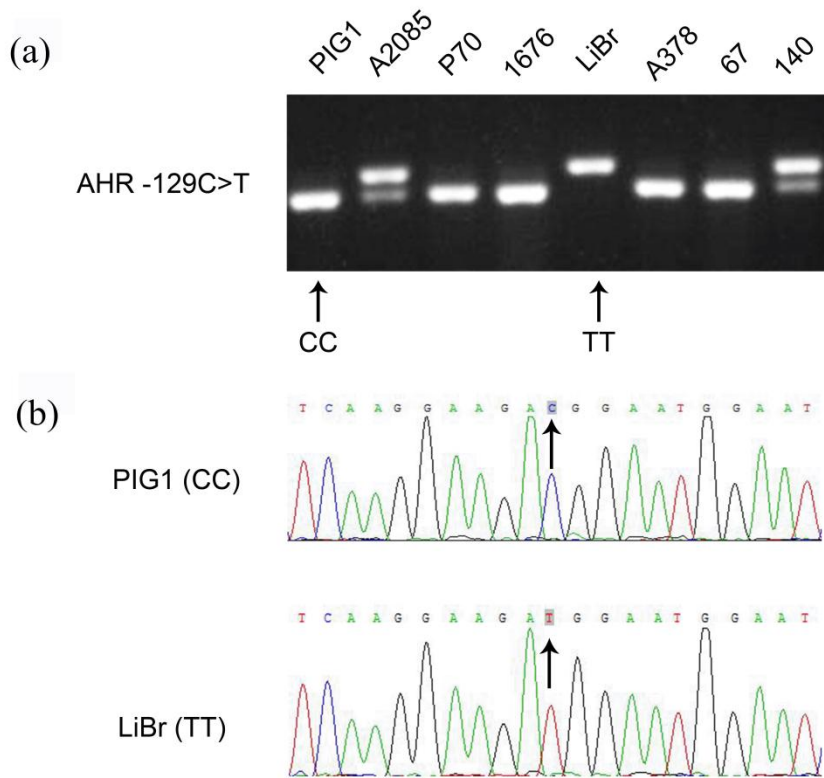

**Supplementary Table S1.** Primary information for disease duration, onset age and body surface area of vitiligo patients.

| Patient ID | Disease duration (month) | Onset age (year) | Body surface area (%) |
|------------|--------------------------|------------------|-----------------------|
| 1          | 180                      | 8                | 1.0                   |
| 2          | 480                      | 22               | 80.0                  |
| 3          | 84                       | 33               | 5.0                   |
| 4          | 312                      | 13               | 73.0                  |
| 5          | 168                      | 10               | 1.0                   |
| 6          | 120                      | 18               | 2.5                   |
| 7          | 12                       | 47               | 1.0                   |
| 8          | 60                       | 10               | 22.5                  |
| 9          | 120                      | 9                | 0.5                   |
| 10         | 36                       | 24               | 2.0                   |
| 11         | 84                       | 40               | 4.0                   |
| 12         | 144                      | 45               | 8.0                   |
| 13         | 180                      | 17               | 9.0                   |
| 14         | 73                       | 12               | 0.5                   |
| 15         | 25                       | 20               | 1.0                   |
| 16         | 20                       | 16               | 7.0                   |
| 17         | 72                       | 19               | 4.0                   |

**Supplementary Table S2.** Primer sequences used for ChIP assay and real-time quantitative PCR amplification.

| Assay  | Gene        | Primer sequences (5'→3')    |                              | Product size (bp) |
|--------|-------------|-----------------------------|------------------------------|-------------------|
|        |             | Forward primer              | Reverse primer               |                   |
| ChIP   | <i>AHR</i>  | CCCTCAAGGAAGACGGA<br>ATGG   | CCGGCTGAATAGCAGGAG<br>CA     | 122               |
|        | <i>AHR</i>  | ACATCACCTACGCCAGT<br>CGC    | TCTATGCCGCTTGGAAGG<br>AT     | 101               |
| RT-PCR | <i>SPI</i>  | ATGATGACACAGCAGGT<br>GGA    | TTGCCATACACTTTCCCAC<br>A     | 190               |
|        | <i>ACTB</i> | TCATGAAGTGTGACGTG<br>GACATC | CAGGAGGAGCAATGATCT<br>TGATCT | 156               |
